# Supplementary material for: Traditional ecological knowledge of the Arhuaco people on water management in the Sierra Nevada de Santa Marta
Source: Research Square preprint supplement (doi:10.21203/rs.3.rs-8895046/v1), 2026-02-23
Supplement: Supplementary file 1 [file 0adaef5006cf640b7d636437.docx]

**Mathematical Specification of the Socio-Hydrological Model**

This section presents the formal mathematical structure of the socio-hydrological model. The equations below define the dynamic adjustment process, normative benefit functions, ecological pressure components, feedback mechanisms, and demographic dynamics underlying the simulations.

1. **State Variable and Dynamic Adjustment**

The conservation status of sacred sites is represented by the evolution of the status of sacred sites (𝑆𝑠𝑡) defined in the range [0,1], where 1 corresponds to a conserved status and 0 to a degraded status.

The system evolves discretely over time according to the following equation:

Where 𝜂 is the adjustment rate Φ𝑡 represents the desired or target state that the system attempts to achieve. The latter depends on the balance between normative benefits (𝐵𝑡) and ecological damage (𝐷𝑡) defined as:

To maintain the ecological consistency of the model, all variables were restricted to the range [0,1] after each iteration, avoiding values outside the possible domain.

Normative benefits derive from compliance with Indigenous norms (𝑁𝑖), government norms (𝑁𝑠) and cooperation between both systems (𝐶𝑐). Their effect was modeled using a Michaelis–Menten saturation function that introduces diminishing returns as the system is conserved, according to the expression:

Ecological damage (𝐷𝑡) represents peasant dynamics (𝑃𝑓) associated with intensive use of land and water resources and is modeled with an inverse saturation function that intensifies negative effects when the system is in better condition or conserved:

The model incorporates three social feedback mechanisms. First, the effectiveness of state regulations is increased by cooperation with the Arhuaco authorities, according to:

Second, local norms are culturally reinforced when sacred sites are degraded, according to the expression:

Where 𝑆𝑠𝑠𝑡𝑎𝑟 represents the culturally desired level of conservation. Third, the model incorporates three types of disturbances that alter the ecological and social dynamics of the river-community system. Environmental disturbance is associated with changes in vegetation cover and land use, representing processes of deforestation and degradation that reduce the river's regulatory capacity; its effect is included in the peasant pressure variable (Pf). Anthropogenic disturbance reflects agricultural expansion and resource extraction, which increase pressure on sacred sites, while demographic disturbance is modeled by the variable Pop, which describes the growth of the peasant population and its indirect effect on Pf, according to:

Where **δ** represents the sensitivity of pressure to demand and **μ** represents the buffering capacity of regulations. Population growth is described by a logistic function:

Where **r** is the growth rate and Kₚₒₚ is the carrying capacity of the basin. These disturbances allow us to explore how population growth and changes in land cover intensify pressure on the river and how norms, both Indigenous and state, cushion their effects.

The model parameters were defined based on a literature review and field observations, in order to realistically represent ecological and social interactions. Each parameter regulates the intensity or sensitivity of the modeled processes: the coefficients 𝛽1 − 𝛽4 weigh normative and pressure influences; the saturation constants 𝐾𝑝𝑜𝑠 and 𝐾𝑛𝑒𝑔 modulate the effects of conservation and degradation, respectively; and the parameters 𝜆, 𝜅, 𝛿 and μ control social and ecological feedbacks.

The values adopted seek to maintain a dynamic balance between loss and recovery processes, reflecting the asymmetry observed in mountain systems, where degradation is rapid and restoration is slower. Table 1 presents the initial values and description of the parameters used in the socio-hydrological model.

**Tabla 1.** Parameters and initial values of the socio-hydrological model

| Symbol | Description | Value |
| --- | --- | --- |
| β₁ | Relative weight of indigenous norms | 0.6 |
| β₂ | Relative weight of state regulations | 0.2 |
| β₃ | Relative weight of cooperation | 0.4 |
| β₄ | Relative weight of farmer pressure | 0.7 |
| η | System adjustment rate | 0.2 |
|  | Positive saturation constant | 0.4 |
|  | Negative saturation constant | 0.3 |
| λ | Modulating effect of cooperation on | 0.6 |
| κ | Cultural reinforcement rate of | 0.1 |
| δ | Rate of increase in peasant pressure | 0.15 |
| μ | Regulatory effectiveness of standards on | 0.3 |

A sensitivity analysis of ±20% was performed to assess the stability of the system in the face of parametric uncertainty, with greater sensitivity observed for indigenous norms (𝛽1) and peasant pressure (𝛽4).
