# Supplementary material for: Traditional ecological knowledge of the Arhuaco people on water management in the Sierra Nevada de Santa Marta
Source: Research Square preprint supplement (doi:10.21203/rs.3.rs-8895046/v1), 2026-02-23
Supplement: Supplementary file 2 [file 0faf7ad217ee4a1e6c0c2eae.docx]

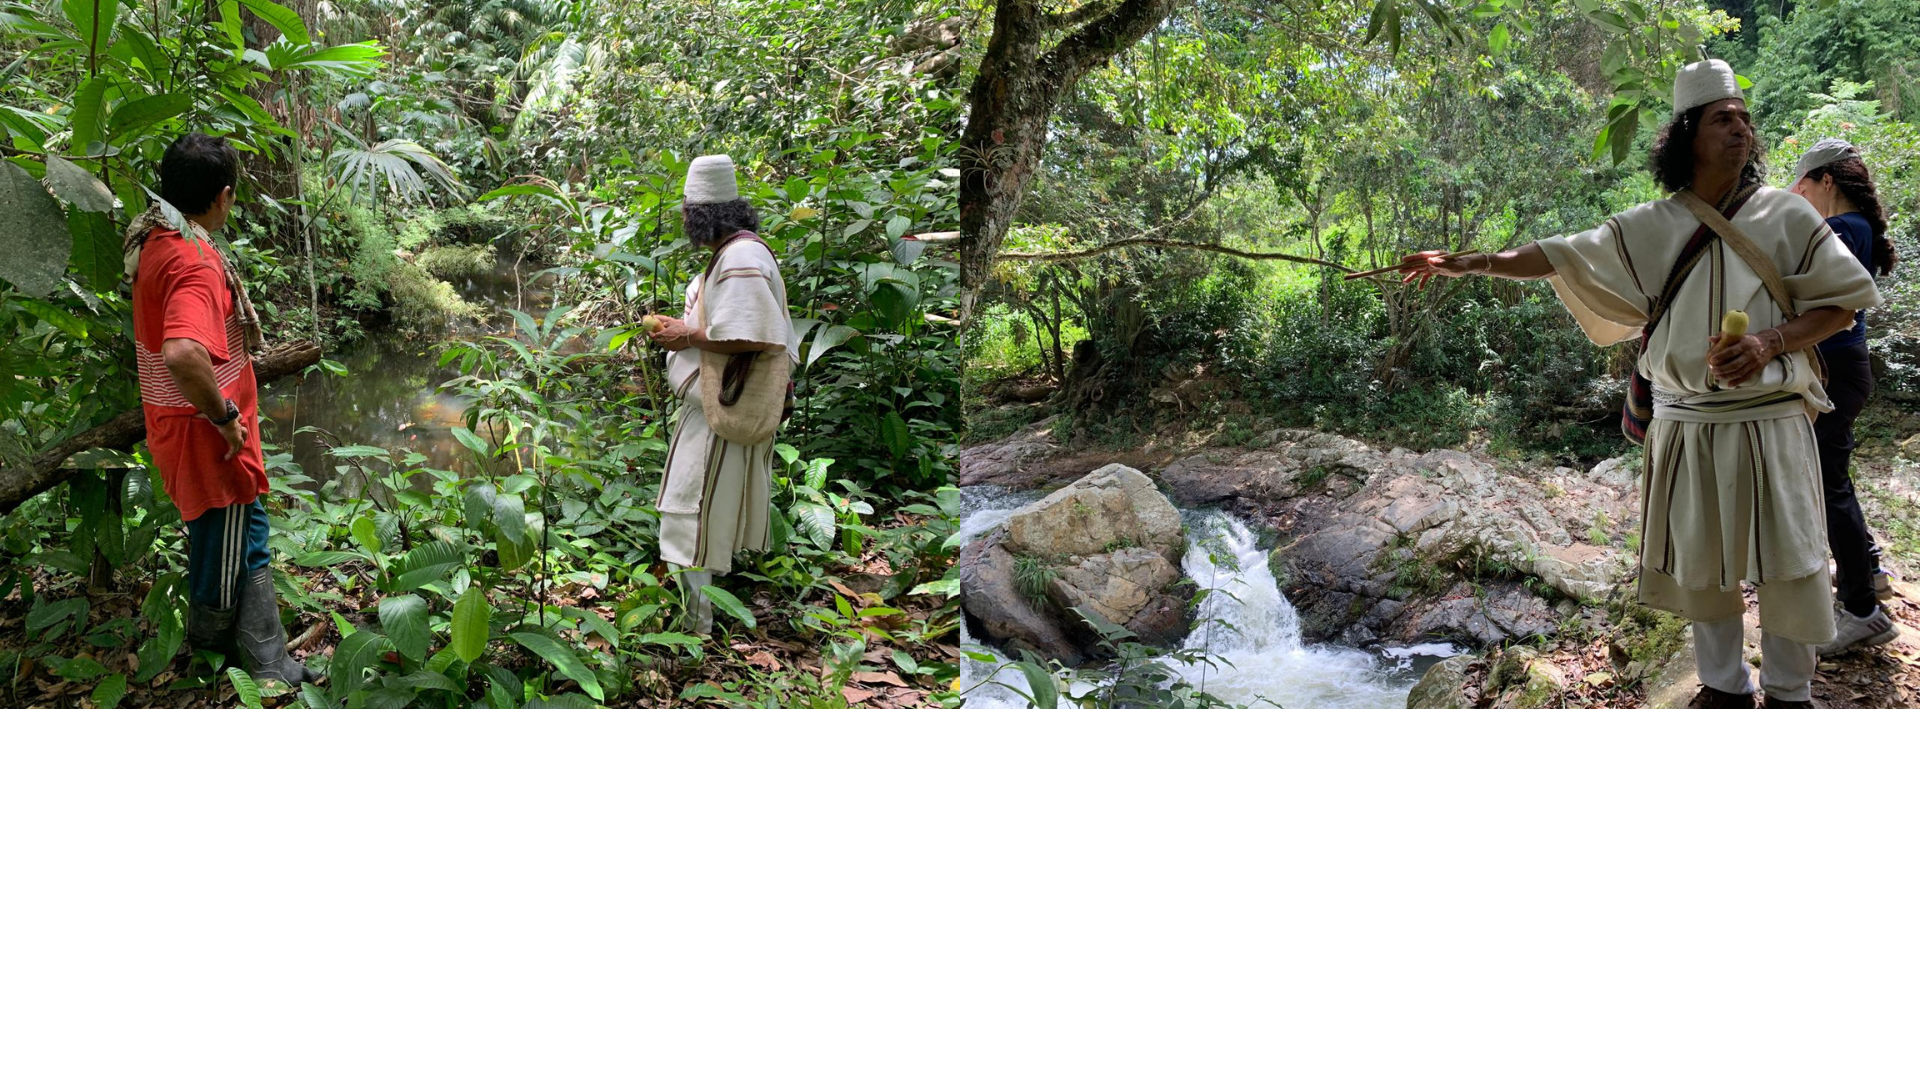


**Figure. 1** Sacred water site (left) and ritual pagamento practice for water (right) documented during field visits with community authorities
